# Supplementary material for: Estimating the economic burden of cardiovascular events in patients receiving lipid-modifying therapy in the UK
Source: PubMed Central journal article supplement — BMJ Open. 2016 Aug 5;6(8):e011805. doi: 10.1136/bmjopen-2016-011805 (PMC4985970; doi:10.1136/bmjopen-2016-011805), 2016-08-05
Supplement: bmjopen-2016-011805supp_material.pdf [file bmjopen-2016-011805supp_material.pdf]

## Supplementary Materials

## Figures:

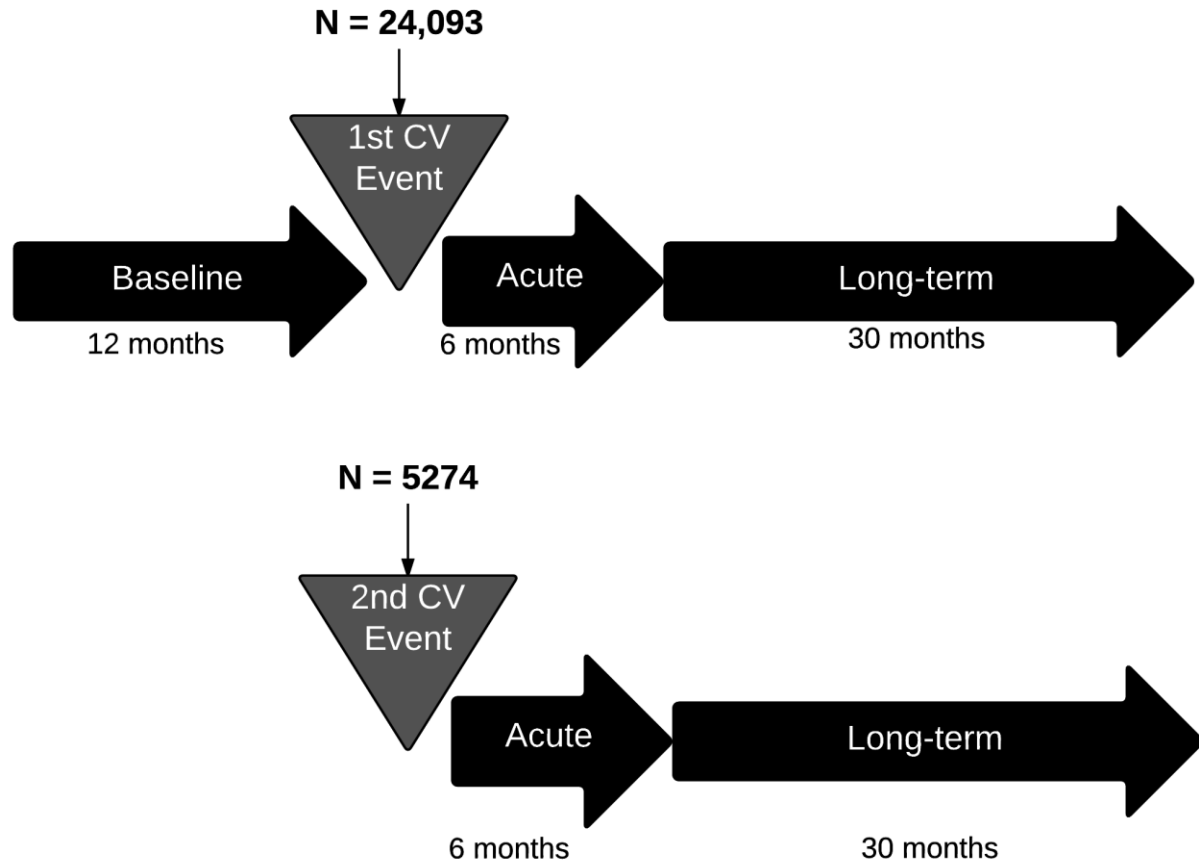

**Figure 1: Overview of Study Design**

Note: The study sample was selected in the following way. We identified unique patients with CV hospitalizations in HES from 2006 to 2012 (105,526), selected those with linked, up-to-standard CPRD data (69,248), selected those who received LMT within 180 days (28,051), and then selected those without a prior history of myocardial infarction or ischemic stroke in the GP data (24,093).

Figure 2: Incremental Costs (£) by Age Group and Cohort

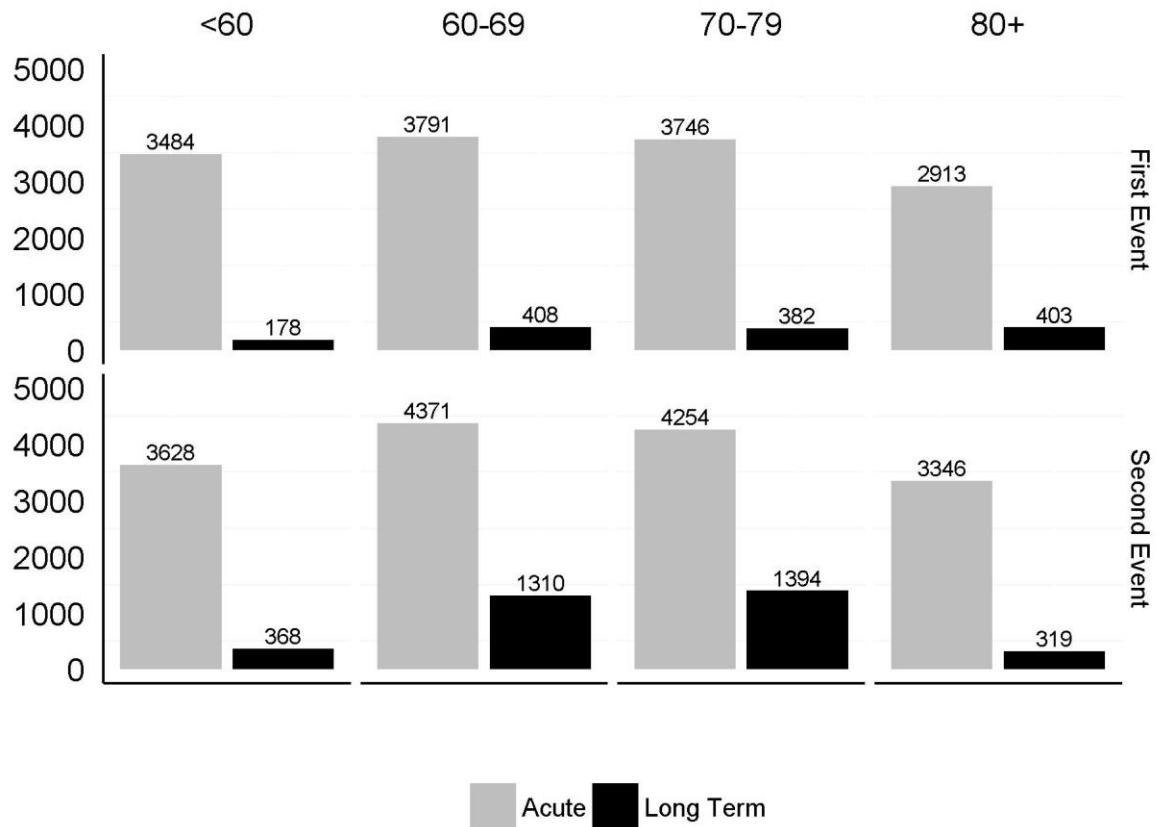

Note: Costs in 2014 £ based on assignment of unit costs to utilization as described in Methods.

**Tables:****Table 1: Codes to Identify Medications\***

| Category                | BNF Chapter Number | BNF Chapter Title                            |
|-------------------------|--------------------|----------------------------------------------|
| Diabetes                | 060101             | Insulins                                     |
|                         | 060102             | Antidiabetic Drugs                           |
| Anti-coagulant          | 020802             | Oral Anticoagulants                          |
|                         | 020900             | Antiplatelet Drugs                           |
| Anti-hypertensive       | 020400             | Beta-adrenoceptor Blocking Drugs             |
|                         | 020501             | Vasodilator Antihypertensive Drugs           |
|                         | 020502             | Centrally Acting Antihypertensive Drugs      |
|                         | 020503             | Adrenergic Neurone Blocking Drugs            |
|                         | 020504             | Alpha-adrenoceptor Blocking Drugs            |
|                         | 020505             | Drugs Affecting The Renin-angiotensin System |
|                         | 020602             | Calcium-channel Blockers                     |
| Lipid modifying therapy | 021204             | Statins*                                     |
|                         | 021202             | Ezetimibe                                    |
|                         | 021203             | Fibrates                                     |
|                         | 021205             | Nicotinic acid                               |
|                         | 021201             | Bile acid sequestrants                       |

\*Statin intensity as defined below was based on Stone NJ, et al. American College of Cardiology/American Heart Association Task Force on Practice Guidelines. 2013 ACC/AHA guideline on the treatment of blood cholesterol to reduce atherosclerotic cardiovascular risk in adults: a report of the American College of Cardiology/American Heart Association Task Force on Practice Guidelines. Circulation. 2014 Jun 24;129 (25 Suppl 2):S1-45. doi: 10.1161/01.cir.0000437738.63853.7a. PMID: 24222016.

**High-intensity statins:** Atorvastatin 40, 80 mg; Rosuvastatin 20, 40 mg; Simvastatin 80 mg

**Medium-intensity statins:** Fluvastatin 80 mg; Simvastatin 20, 40 mg; Atorvastatin 10, 20 mg; Rosuvastatin 5, 10 mg; Lovastatin 40 mg; Pravastatin 40, 80 mg; Pitavastatin 2, 4 mg

**Low-intensity statins:** Fluvastatin 20-40 mg; Simvastatin 10 mg; Lovastatin 20 mg; Pravastatin 10-20 mg

**Table 2: Codes to Identify Hospitalizations**

| <b>Hospitalization Diagnosis Code(s)</b> | <b>Condition</b>                                                                          | <b>Type of Code</b>     |
|------------------------------------------|-------------------------------------------------------------------------------------------|-------------------------|
| I21, I22                                 | Myocardial infarction                                                                     | ICD-10 diagnosis        |
| I20.0, I20.9, I24.0, I24.8, I24.9        | Unstable angina                                                                           | ICD-10 diagnosis        |
| I63                                      | Ischemic stroke                                                                           | ICD-10 diagnosis        |
| I11.0, I13.0, I13.2, I50                 | Heart failure                                                                             | ICD-10 diagnosis        |
| G45.8, G45.9                             | Transient ischemic attack                                                                 | ICD-10 diagnosis        |
| K40                                      | Saphenous vein graft replacement of coronary artery                                       | OPCS procedure for CABG |
| K41                                      | Other autograft replacement of coronary artery                                            | OPCS procedure for CABG |
| K42                                      | Allograft replacement of coronary artery                                                  | OPCS procedure for CABG |
| K43                                      | Prosthetic replacement of coronary artery                                                 | OPCS procedure for CABG |
| K44                                      | Other replacement of coronary artery                                                      | OPCS procedure for CABG |
| K45                                      | Connection of thoracic artery to coronary artery                                          | OPCS procedure for CABG |
| K46                                      | Other bypass of coronary artery                                                           | OPCS procedure for CABG |
| K49                                      | Transluminal balloon angioplasty of coronary artery                                       | OPCS procedure for PTCA |
| K50                                      | Other therapeutic transluminal operations on coronary artery                              | OPCS procedure for PTCA |
| K75                                      | Percutaneous transluminal balloon angioplasty and insertion of stent into coronary artery | OPCS procedure for PTCA |

Note: The number of characters sufficient to capture the entire set of codes is provided above.
